# Supplementary material for: Stability in eosinophil categorisation during subsequent severe exacerbations of COPD
Source: HighWire-hosted journal article supplement (doi:10.1136/bmjresp-2021-000960), 2021-08-01

Total cohort (N=237)

AECOPD 1

AECOPD 2

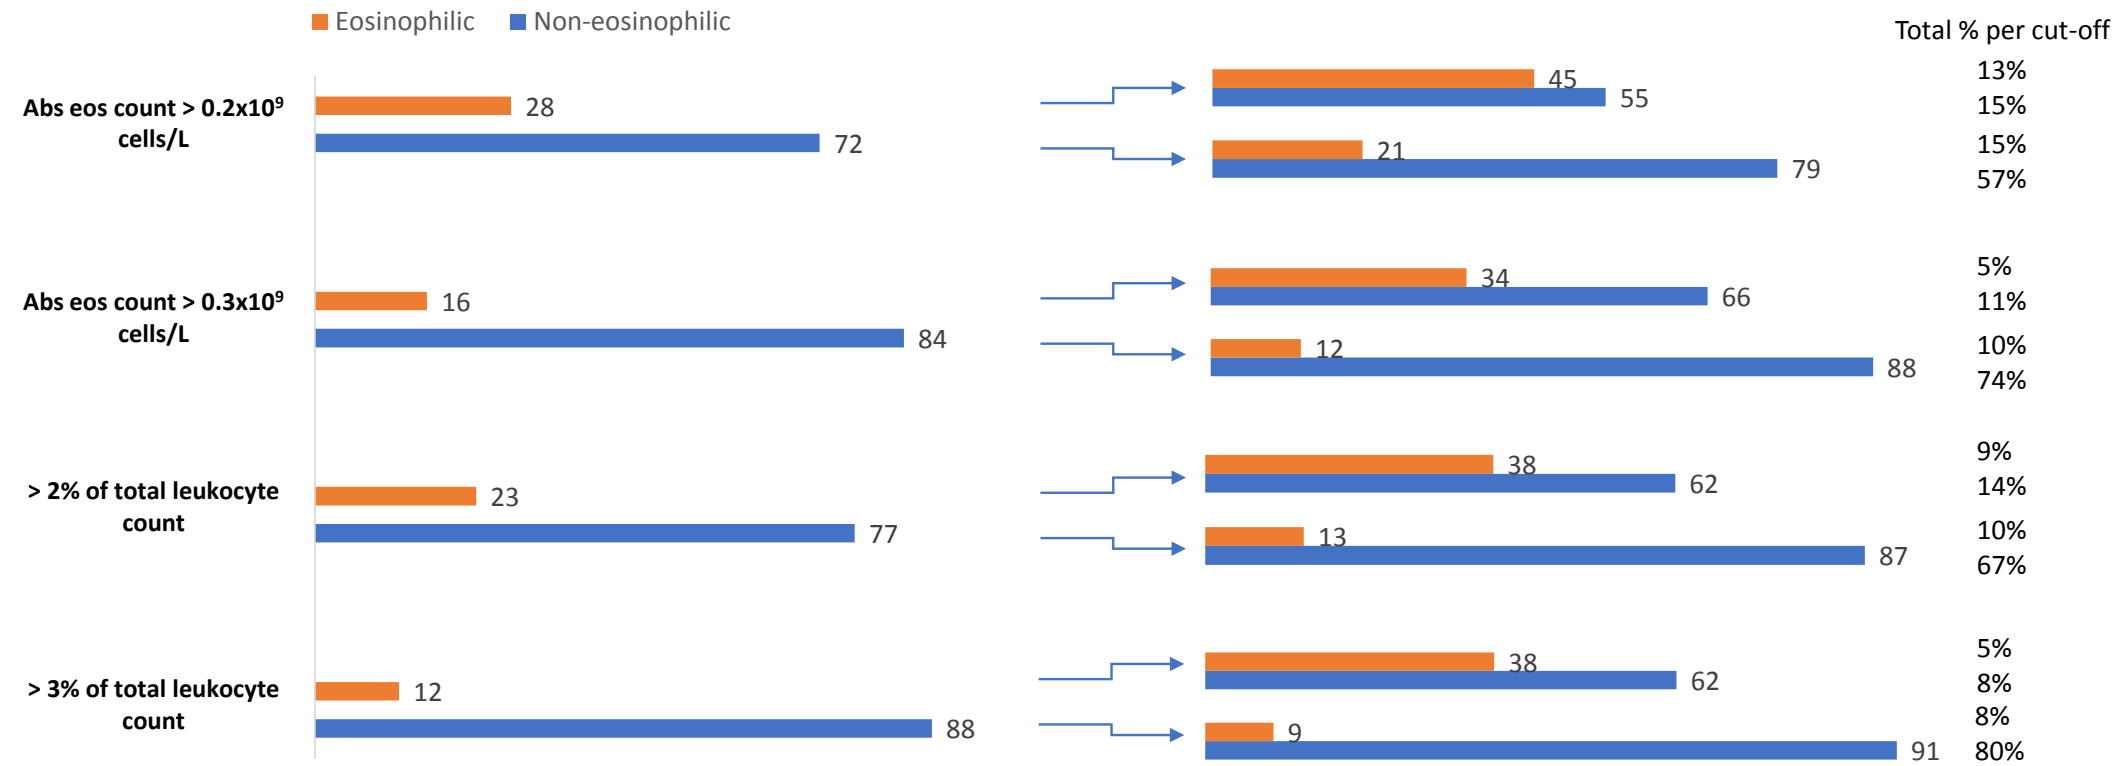

Group 1 (N=139)

AECOPD 1

AECOPD 2

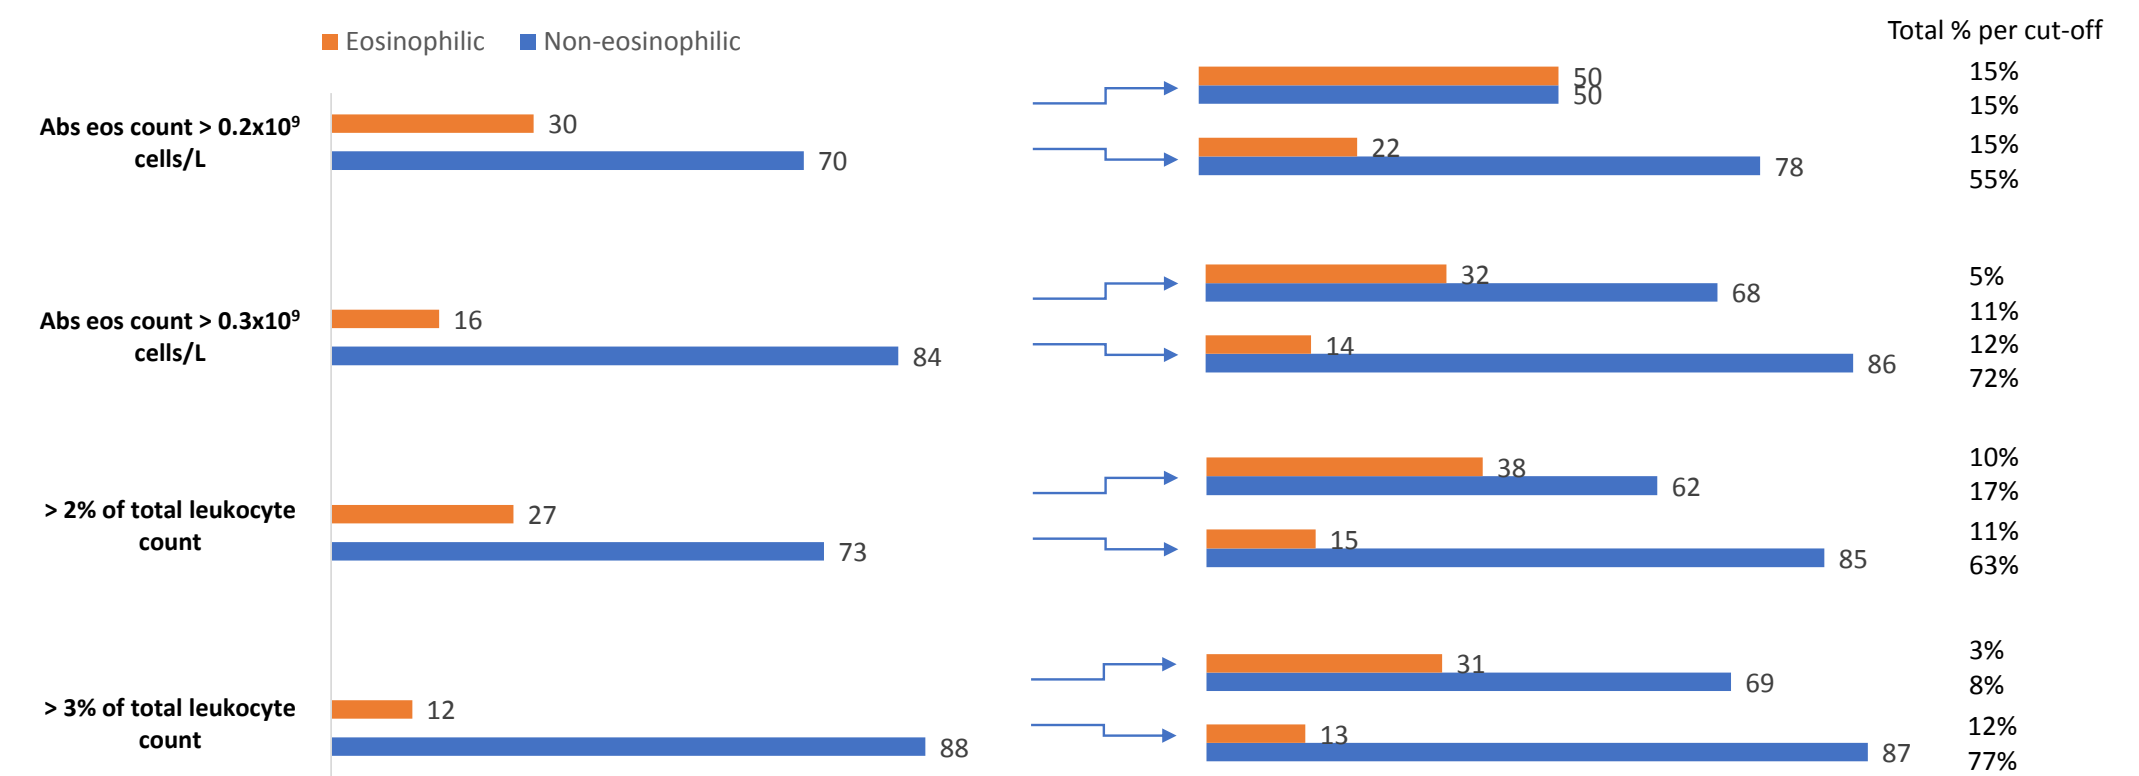

Group 2 (N=17)

AECOPD 1

AECOPD 2

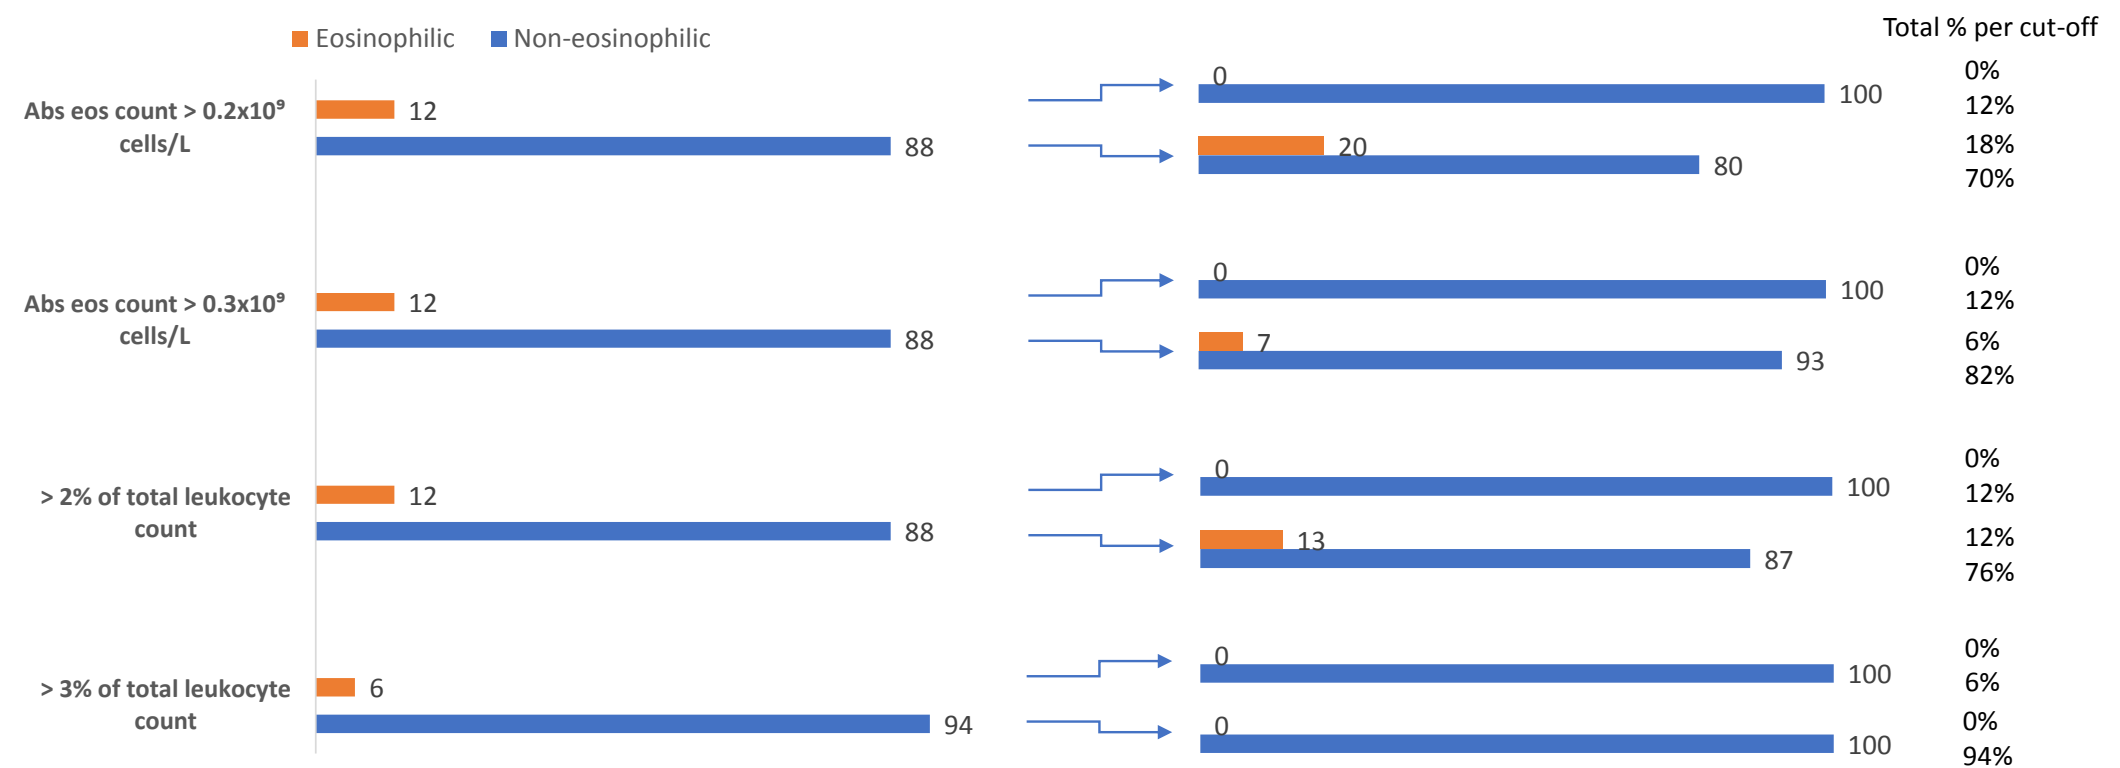

Group 3 (N=81)

AECOPD without prior steroid use

AECOPD with prior steroid use

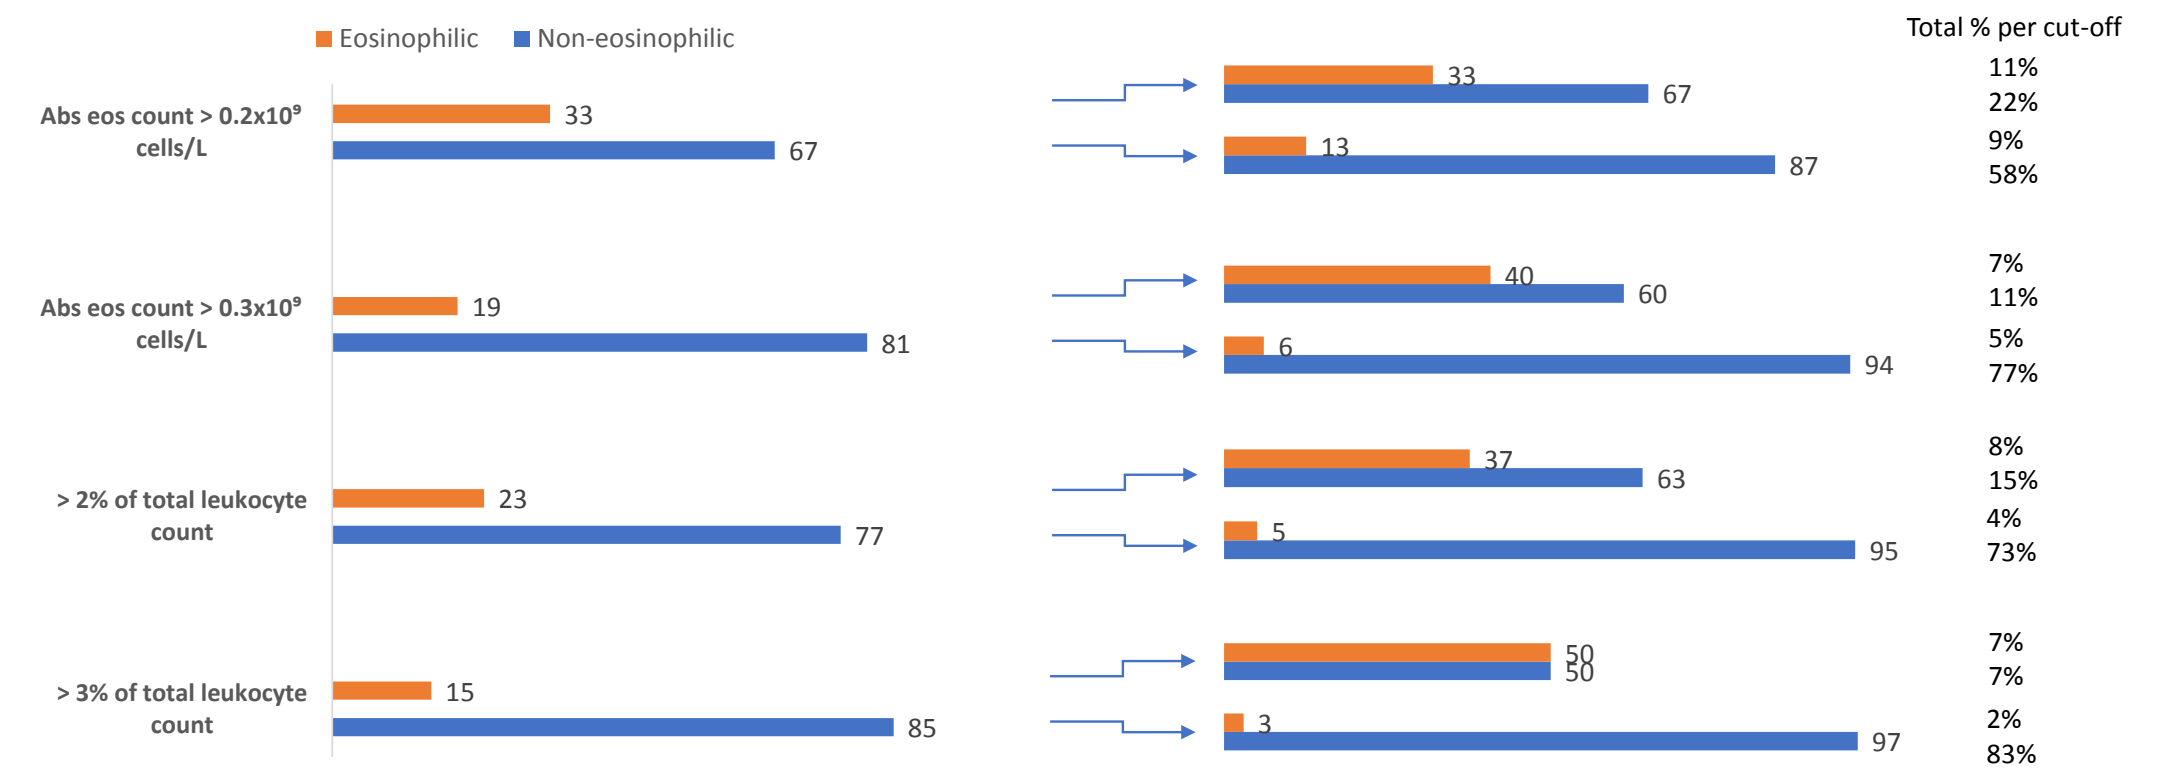

Supplement: bmjresp-2021-000960supp001_data_supplement.pdf [file bmjresp-2021-000960supp001_data_supplement.pdf]
